# Supplementary material for: Brain Specific Estrogen Ameliorates Cognitive Effects of Surgical Menopause in Mice
Source: PubMed Central journal article supplement — bioRxiv. 2023 Aug 13:2023.08.09.552687. Preprint. [Version 1] doi: 10.1101/2023.08.09.552687 (PMC10441397; doi:10.1101/2023.08.09.552687), 2023-08-13
Supplement: NIHPP2023.08.09.552687V1-supplement-1.pdf [file NIHPP2023.08.09.552687V1-supplement-1.pdf]

## Supplemental material

### Novel Object Recognition Test

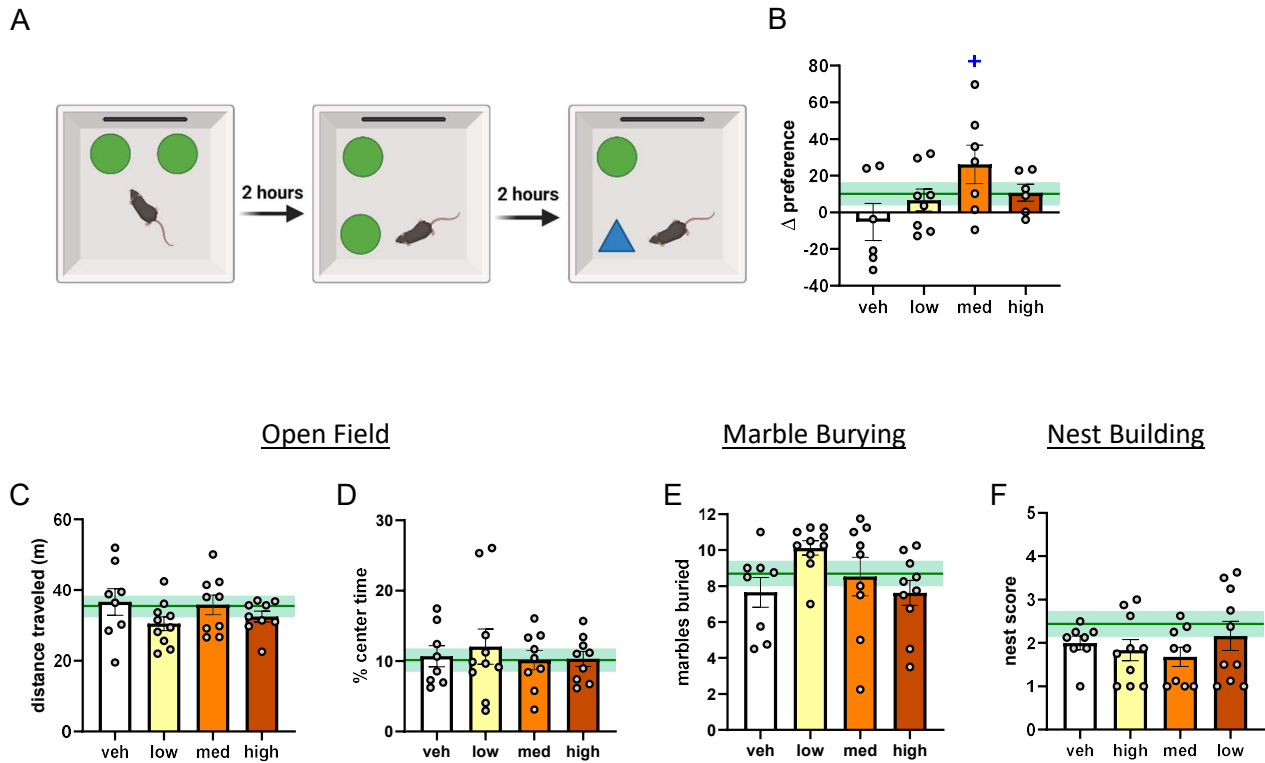

**Supplemental Figure 1. DHED does not alter anxiety-like behavior or activities of daily living.** (A) Schematic of novel object recognition (created in BioRender) depicting the training trial, object place testing trial and novel object recognition testing trial. (B) Difference between % time spent with object in its new place during novel object recognition testing trial vs % time with replaced object during training trial. Open Field (C) distance traveled and (D) % time in the center of the open field arena. (E) Number of marbles buried during the marble burying test. (F) Nest scores from the nest building task. Data are presented as mean  $\pm$  SEM.  $+p < 0.05$ , one-sample T-test vs chance (0). Data are represented as mean  $\pm$  SEM. One-way ANOVA with Dunnett's post hoc test vs vehicle  $*p < 0.05$ . Gonadally intact, vehicle-treated age-matched reference group represented on bar graphs as mean (dark green line)  $\pm$  SEM (light green shading). veh=vehicle; med=medium.
